# Supplementary material for: Multifunctional liposomes Co-encapsulating epigallocatechin-3-gallate (EGCG) and miRNA for atherosclerosis lesion elimination
Source: Royal Society of Chemistry journal article supplement (doi:10.1039/d3na00369h), 2023-10-30
Supplement: d3na00369h1.pdf [file d3na00369h1.pdf]

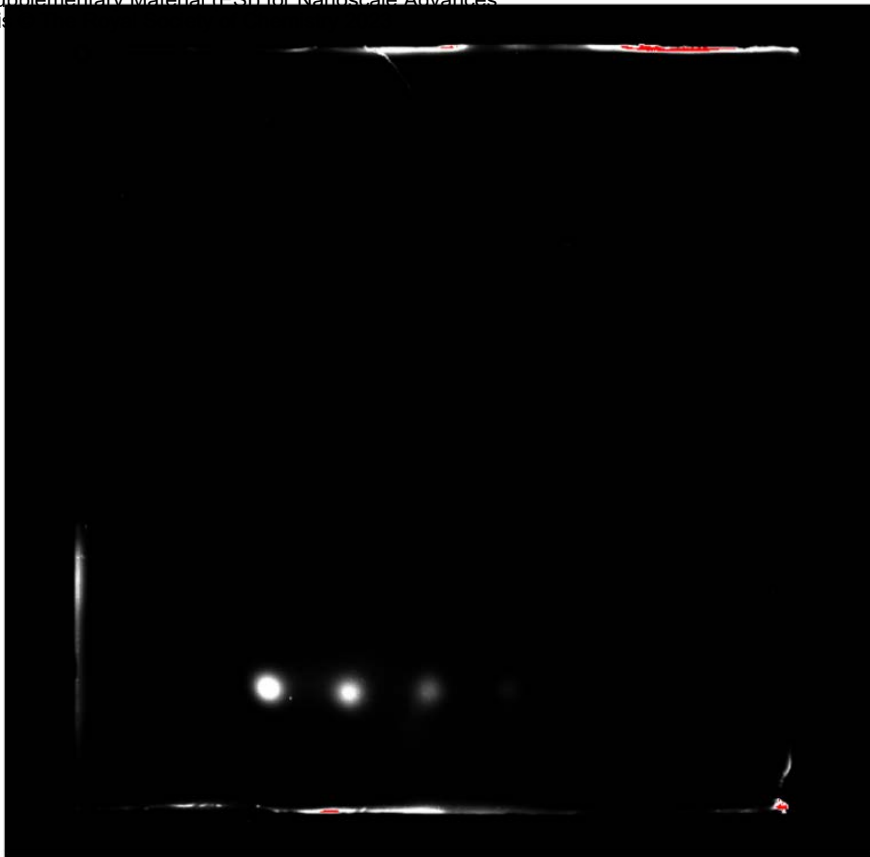

**DOTAP:miR-223 1:1.5 1:1.25 1:1 1:0.75 1:1.5**

**(weight ratio)**



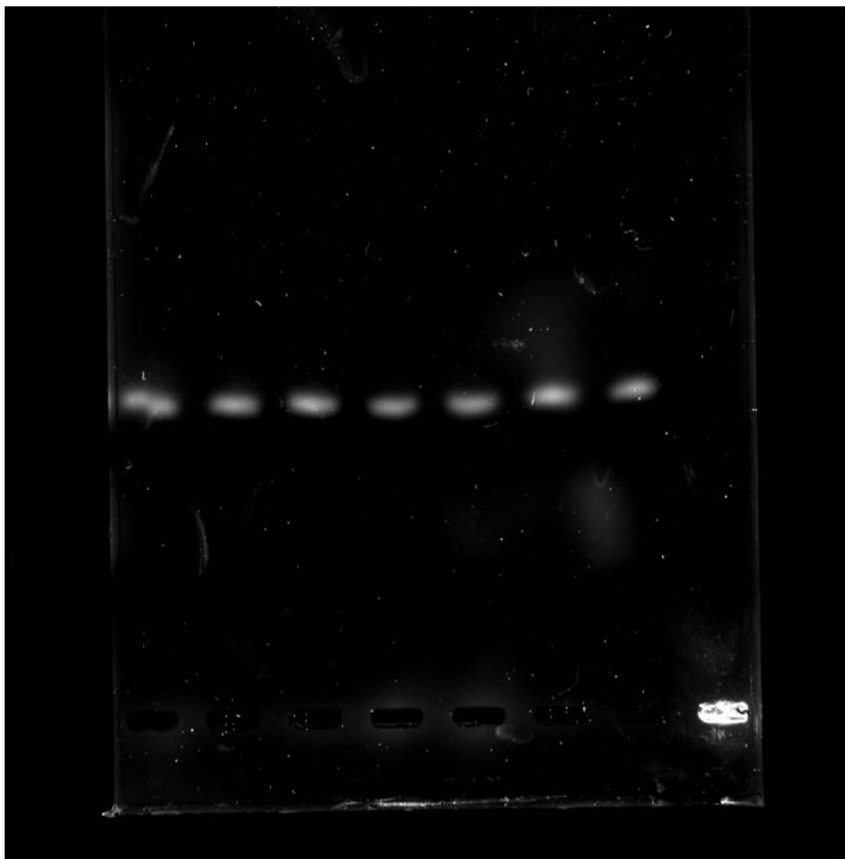

Incubation(h) 0 0.5 1 1.5 2 4 6

lip@EGCG/miR-223
